# Supplementary material
Source: PubMed Central journal article supplement (PMC2933342)
Supplement: mmc1.pdf [file mmc1.pdf]

## Supplemental Data

### A Focal Epilepsy and Intellectual Disability Syndrome

#### Is Due to a Mutation in *TBC1D24*

Mark A. Corbett, Melanie Bahlo, Lachlan Jolly, Zaid Afawi, Alison E. Gardner, Karen L. Oliver, Stanley Tan, Amy Coffey, John C. Mulley, Leanne M. Dibbens, Walid Simri, Adel Shalata, Sara Kivity, Graeme D. Jackson, Samuel F. Berkovic, and Jozef Gecez

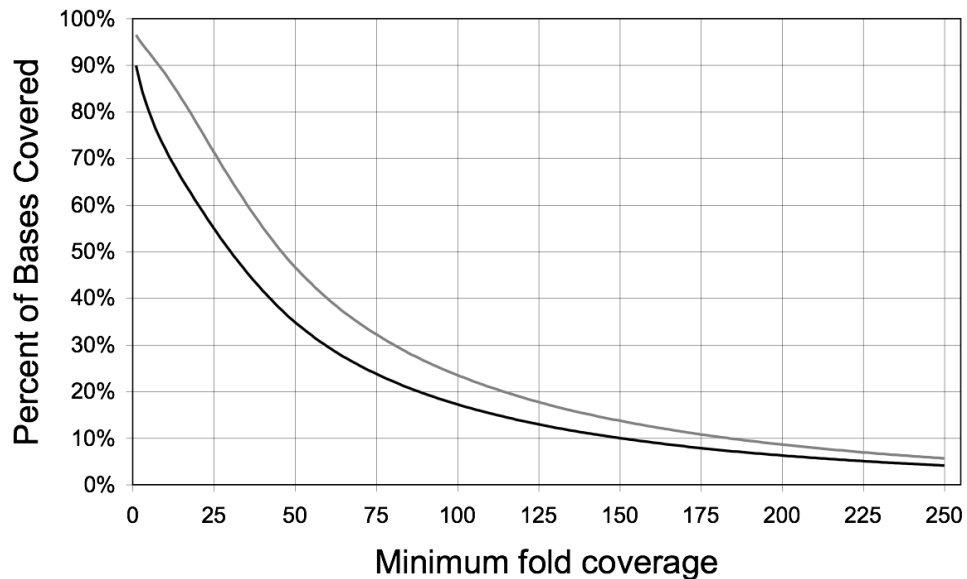

**Figure S1. A Single Lane of Illumina Sequence Provides Sufficient Coverage for Identification of Sequence Variants**

The percent of the total sequence in the linked interval (black line) or targeted on the array (grey line) relative to the level sequence coverage

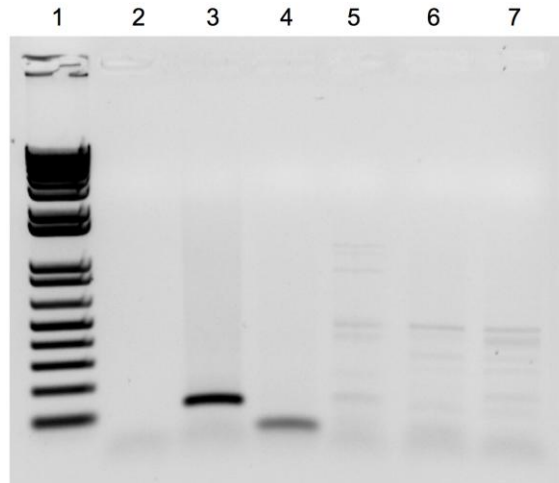

**Figure S2. PRSS41 Is Not Expressed in the Human Brain**

Primers specific to PRSS41 were used to amplify the product of the PRSS41 gene from cDNA derived from human testis, cortex, frontal lobe, occipital lobe and hippocampus (lanes 3 - 7 respectively). The expected product of 133bp is only visible in testis. Lane 2 shows lack of amplification from a no template control reaction, lane 1 shows product sizes indicated by the 1kb+ marker (Invitrogen).

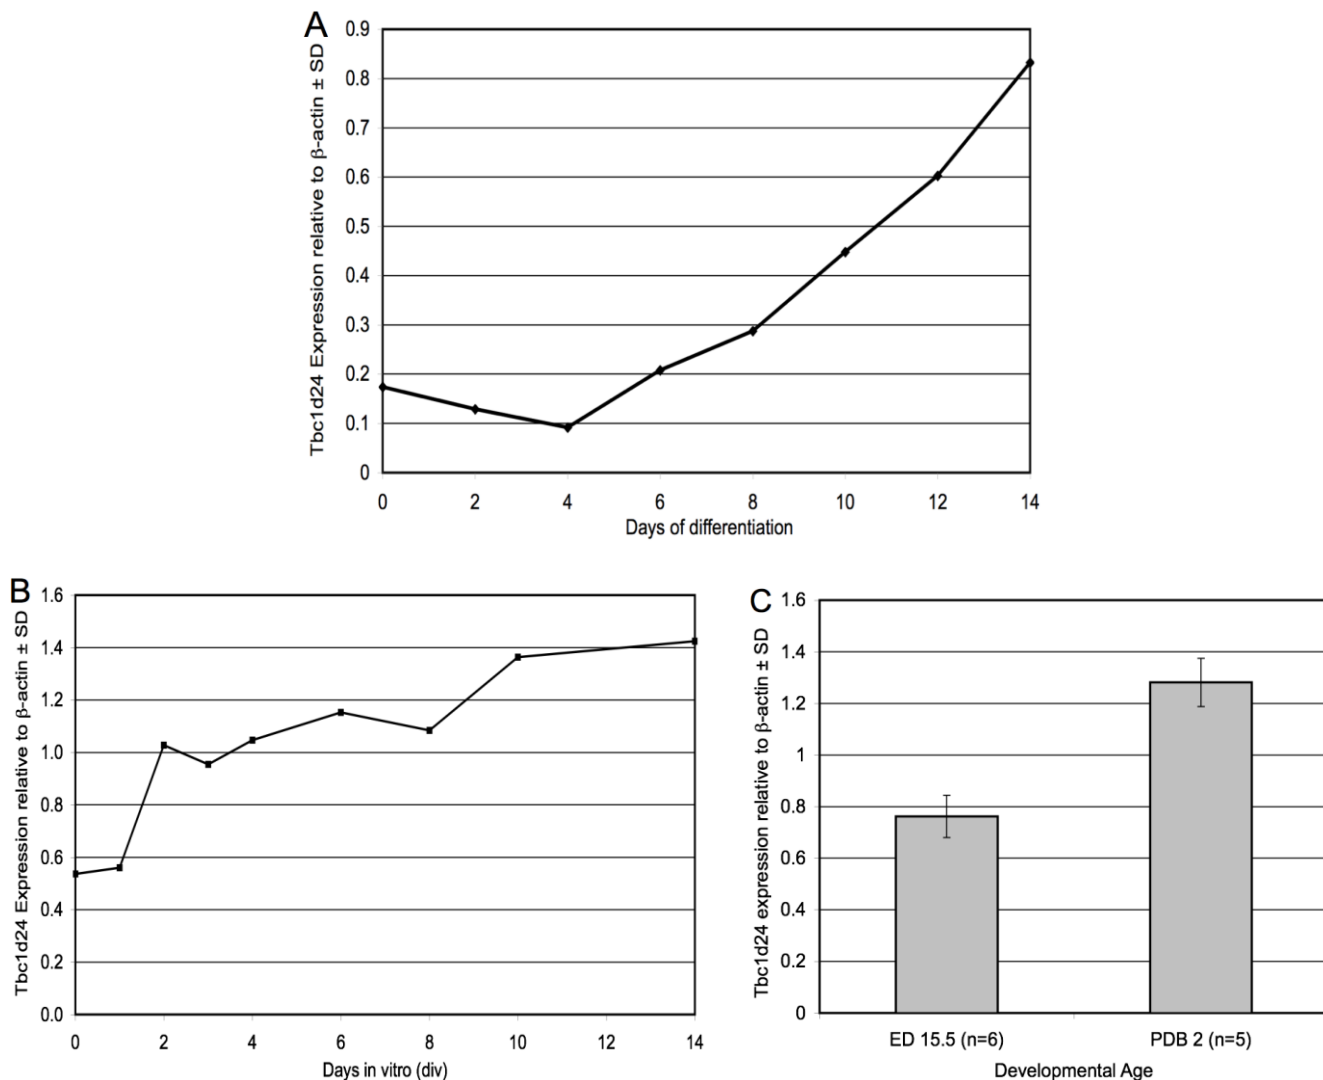

**Figure S3. TBC1D24 Increases in Expression as Cells of Neuronal Origin Approach Terminal Differentiation**

Expression of mouse *Tbc1d24* (primer bank ID 26350797a2) normalised to *Actb* quantified using the relative standard curve qPCR method as described previously<sup>21</sup> in cDNA derived from total RNA extracts from: **(A)** Mouse embryonic stem cells (ESC) directed to differentiate into cells of the neuronal lineage<sup>22</sup>; **(B)** mouse embryonic day (ED) 18.5 primary hippocampal neurons cultured at 0, 1, 2, 3, 4, 6, 8, 10 and 14 days *in vitro*; and **(C)** mouse whole brain at ED15.5 and post birth day (PBD) 2. Error bars indicate standard deviations between individuals.

**Table S1. Sequences Tiled on the Capture Array but Subsequently Not Assembled Are Enriched in GC Content and Repeated Sequences**

| Base         | Bases Tiled but Not Covered |                    |             |       |       |                    | Bases Tiled |                    |             |       |         |                    |
|--------------|-----------------------------|--------------------|-------------|-------|-------|--------------------|-------------|--------------------|-------------|-------|---------|--------------------|
|              | Repeats                     |                    | Non-Repeats |       | Total |                    | Repeats     |                    | Non-Repeats |       | Total   |                    |
|              | Count                       | %                  | Count       | %     | Count | %                  | Count       | %                  | Count       | %     | Count   | %                  |
| <b>A</b>     | 2952                        | 13.50              | 10019       | 16.07 | 12971 | 15.40              | 101445      | 25.27              | 383911      | 19.96 | 485356  | 20.87              |
| <b>C</b>     | 8062                        | 36.86              | 21115       | 33.87 | 29177 | 34.65 <sup>b</sup> | 97644       | 24.33              | 570505      | 29.65 | 668149  | 28.73 <sup>b</sup> |
| <b>G</b>     | 7701                        | 35.21              | 20962       | 33.63 | 28663 | 34.04 <sup>b</sup> | 98540       | 24.55              | 575805      | 29.93 | 674345  | 29.00 <sup>b</sup> |
| <b>T</b>     | 3155                        | 14.43              | 10244       | 16.43 | 13399 | 15.91              | 103780      | 25.85              | 393653      | 20.46 | 497433  | 21.39              |
| <b>Total</b> | 21870                       | 25.97 <sup>a</sup> | 62340       | 74.03 | 84210 |                    | 401409      | 17.26 <sup>a</sup> | 1923874     | 82.74 | 2325283 |                    |

<sup>a</sup> Statistically significant enrichment of repeated sequences (as defined by repeat masker) compared to that expected from the total tiled content  $p < 0.05$  by  $\chi^2$  analysis.

<sup>b</sup> Statistically significant enrichment of the combined G/C content not covered compared to that expected from the total tiled content,  $p < 0.05$  by  $\chi^2$  analysis.

**Table S2. Summary of All Unique Homozygous SNPs**  
(See accompanying Excel spreadsheet)

### Supplemental References

21. Tarpey, P.S., Raymond, F.L., Nguyen, L.S., Rodriguez, J., Hackett, A., Vandeleur, L., Smith, R., Shoubridge, C., Edkins, S., Stevens, C. *et al.* (2007). Mutations in UPF3B, a member of the nonsense-mediated mRNA decay complex, cause syndromic and nonsyndromic mental retardation. *Nat. Genet* 39, 1127-1133
22. Ying, Q., Stavridis, M., Griffiths, D., Li, M. and Smith, A. (2003). Conversion of embryonic stem cells into neuroectodermal precursors in adherent monoculture. *Nat. Biotechnol* 21, 183-186.
